# Supplementary material for: The impact of pulmonary cachexia on inpatient outcomes: A national study
Source: PubMed Central journal article supplement — Ann Thorac Med. 2023 Jul 19;18(3):156–61. doi: 10.4103/atm.atm_31_23 (PMC10473060; doi:10.4103/atm.atm_31_23), 2023-07-19
Supplement: ATM-18-156_Suppl1.pdf [file ATM-18-156_Suppl1.pdf]

**Supplementary Table 12: Case definition based on International Classification for Diseases, Tenth Revision (ICD-10) codes for solid cancers**

| ICD-10-CM diagnosis of solid cancer | ICD-10-CM code description                                            |
|-------------------------------------|-----------------------------------------------------------------------|
| C000                                | Malignant neoplasm of external upper lip                              |
| C001                                | Malignant neoplasm of external lower lip                              |
| C002                                | Malignant neoplasm of external lip, unspecified                       |
| C003                                | Malignant neoplasm of upper lip, inner aspect                         |
| C004                                | Malignant neoplasm of lower lip, inner aspect                         |
| C005                                | Malignant neoplasm of lip, unspecified, inner aspect                  |
| C006                                | Malignant neoplasm of commissure of lip, unspecified                  |
| C008                                | Malignant neoplasm of overlapping sites of lip                        |
| C009                                | Malignant neoplasm of lip, unspecified                                |
| C01                                 | Malignant neoplasm of base of tongue                                  |
| C020                                | Malignant neoplasm of dorsal surface of tongue                        |
| C021                                | Malignant neoplasm of border of tongue                                |
| C022                                | Malignant neoplasm of ventral surface of tongue                       |
| C023                                | Malignant neoplasm of anterior two-thirds of tongue, part unspecified |
| C024                                | Malignant neoplasm of lingual tonsil                                  |
| C028                                | Malignant neoplasm of overlapping sites of tongue                     |
| C029                                | Malignant neoplasm of tongue, unspecified                             |
| C030                                | Malignant neoplasm of upper gum                                       |
| C031                                | Malignant neoplasm of lower gum                                       |
| C039                                | Malignant neoplasm of gum, unspecified                                |
| C040                                | Malignant neoplasm of anterior floor of mouth                         |
| C041                                | Malignant neoplasm of lateral floor of mouth                          |
| C048                                | Malignant neoplasm of overlapping sites of floor of mouth             |
| C049                                | Malignant neoplasm of floor of mouth, unspecified                     |
| C050                                | Malignant neoplasm of hard palate                                     |
| C051                                | Malignant neoplasm of soft palate                                     |
| C052                                | Malignant neoplasm of uvula                                           |
| C058                                | Malignant neoplasm of overlapping sites of palate                     |
| C059                                | Malignant neoplasm of palate, unspecified                             |
| C060                                | Malignant neoplasm of cheek mucosa                                    |
| C061                                | Malignant neoplasm of vestibule of mouth                              |
| C062                                | Malignant neoplasm of retromolar area                                 |
| C0680                               | Malignant neoplasm of overlapping sites of unspecified parts of mouth |
| C0689                               | Malignant neoplasm of overlapping sites of other parts of mouth       |
| C069                                | Malignant neoplasm of mouth, unspecified                              |
| C07                                 | Malignant neoplasm of parotid gland                                   |
| C080                                | Malignant neoplasm of submandibular gland                             |
| C081                                | Malignant neoplasm of sublingual gland                                |
| C089                                | Malignant neoplasm of major salivary gland, unspecified               |
| C090                                | Malignant neoplasm of tonsillar fossa                                 |
| C091                                | Malignant neoplasm of tonsillar pillar (anterior) (posterior)         |
| C098                                | Malignant neoplasm of overlapping sites of tonsil                     |
| C099                                | Malignant neoplasm of tonsil, unspecified                             |
| C100                                | Malignant neoplasm of vallecula                                       |
| C101                                | Malignant neoplasm of anterior surface of epiglottis                  |
| C102                                | Malignant neoplasm of lateral wall of oropharynx                      |
| C103                                | Malignant neoplasm of posterior wall of oropharynx                    |
| C104                                | Malignant neoplasm of branchial cleft                                 |
| C108                                | Malignant neoplasm of overlapping sites of oropharynx                 |
| C109                                | Malignant neoplasm of oropharynx, unspecified                         |
| C110                                | Malignant neoplasm of superior wall of nasopharynx                    |
| C111                                | Malignant neoplasm of posterior wall of nasopharynx                   |
| C112                                | Malignant neoplasm of lateral wall of nasopharynx                     |
| C113                                | Malignant neoplasm of anterior wall of nasopharynx                    |
| C118                                | Malignant neoplasm of overlapping sites of nasopharynx                |

*Contd...*

**Supplementary Table 12: Contd...**

| <b>ICD-10-CM diagnosis of solid cancer</b> | <b>ICD-10-CM code description</b>                                       |
|--------------------------------------------|-------------------------------------------------------------------------|
| C119                                       | Malignant neoplasm of nasopharynx, unspecified                          |
| C12                                        | Malignant neoplasm of pyriform sinus                                    |
| C130                                       | Malignant neoplasm of postcricoid region                                |
| C131                                       | Malignant neoplasm of aryepiglottic fold, hypopharyngeal aspect         |
| C132                                       | Malignant neoplasm of posterior wall of hypopharynx                     |
| C138                                       | Malignant neoplasm of overlapping sites of hypopharynx                  |
| C139                                       | Malignant neoplasm of hypopharynx, unspecified                          |
| C140                                       | Malignant neoplasm of pharynx, unspecified                              |
| C142                                       | Malignant neoplasm of Waldeyer's ring                                   |
| C148                                       | Malignant neoplasm of overlapping sites of lip, oral cavity and pharynx |
| C153                                       | Malignant neoplasm of upper third of esophagus                          |
| C154                                       | Malignant neoplasm of middle third of esophagus                         |
| C155                                       | Malignant neoplasm of lower third of esophagus                          |
| C158                                       | Malignant neoplasm of overlapping sites of esophagus                    |
| C159                                       | Malignant neoplasm of esophagus, unspecified                            |
| C160                                       | Malignant neoplasm of cardia                                            |
| C161                                       | Malignant neoplasm of fundus of stomach                                 |
| C162                                       | Malignant neoplasm of body of stomach                                   |
| C163                                       | Malignant neoplasm of pyloric antrum                                    |
| C164                                       | Malignant neoplasm of pylorus                                           |
| C165                                       | Malignant neoplasm of lesser curvature of stomach, unspecified          |
| C166                                       | Malignant neoplasm of greater curvature of stomach, unspecified         |
| C168                                       | Malignant neoplasm of overlapping sites of stomach                      |
| C169                                       | Malignant neoplasm of stomach, unspecified                              |
| C170                                       | Malignant neoplasm of duodenum                                          |
| C171                                       | Malignant neoplasm of jejunum                                           |
| C172                                       | Malignant neoplasm of ileum                                             |
| C173                                       | Meckel's diverticulum, malignant                                        |
| C178                                       | Malignant neoplasm of overlapping sites of small intestine              |
| C179                                       | Malignant neoplasm of small intestine, unspecified                      |
| C180                                       | Malignant neoplasm of cecum                                             |
| C181                                       | Malignant neoplasm of appendix                                          |
| C182                                       | Malignant neoplasm of ascending colon                                   |
| C183                                       | Malignant neoplasm of hepatic flexure                                   |
| C184                                       | Malignant neoplasm of transverse colon                                  |
| C185                                       | Malignant neoplasm of splenic flexure                                   |
| C186                                       | Malignant neoplasm of descending colon                                  |
| C187                                       | Malignant neoplasm of sigmoid colon                                     |
| C188                                       | Malignant neoplasm of overlapping sites of colon                        |
| C189                                       | Malignant neoplasm of colon, unspecified                                |
| C19                                        | Malignant neoplasm of rectosigmoid junction                             |
| C20                                        | Malignant neoplasm of rectum                                            |
| C210                                       | Malignant neoplasm of anus, unspecified                                 |
| C211                                       | Malignant neoplasm of anal canal                                        |
| C212                                       | Malignant neoplasm of cloacogenic zone                                  |
| C218                                       | Malignant neoplasm of overlapping sites of rectum, anus and anal canal  |
| C220                                       | Liver cell carcinoma                                                    |
| C221                                       | Intrahepatic bile duct carcinoma                                        |
| C222                                       | Hepatoblastoma                                                          |
| C223                                       | Angiosarcoma of liver                                                   |
| C224                                       | Other sarcomas of liver                                                 |
| C227                                       | Other specified carcinomas of liver                                     |
| C228                                       | Malignant neoplasm of liver, primary, unspecified as to type            |
| C229                                       | Malignant neoplasm of liver, not specified as primary or secondary      |
| C23                                        | Malignant neoplasm of gallbladder                                       |

*Contd...*

**Supplementary Table 12: Contd...**

| <b>ICD-10-CM diagnosis of solid cancer</b> | <b>ICD-10-CM code description</b>                                        |
|--------------------------------------------|--------------------------------------------------------------------------|
| C240                                       | Malignant neoplasm of extrahepatic bile duct                             |
| C241                                       | Malignant neoplasm of ampulla of Vater                                   |
| C248                                       | Malignant neoplasm of overlapping sites of biliary tract                 |
| C249                                       | Malignant neoplasm of biliary tract, unspecified                         |
| C250                                       | Malignant neoplasm of head of pancreas                                   |
| C251                                       | Malignant neoplasm of body of pancreas                                   |
| C252                                       | Malignant neoplasm of tail of pancreas                                   |
| C253                                       | Malignant neoplasm of pancreatic duct                                    |
| C254                                       | Malignant neoplasm of endocrine pancreas                                 |
| C257                                       | Malignant neoplasm of other parts of pancreas                            |
| C258                                       | Malignant neoplasm of overlapping sites of pancreas                      |
| C259                                       | Malignant neoplasm of pancreas, unspecified                              |
| C260                                       | Malignant neoplasm of intestinal tract, part unspecified                 |
| C261                                       | Malignant neoplasm of spleen                                             |
| C269                                       | Malignant neoplasm of ill-defined sites within the digestive system      |
| C300                                       | Malignant neoplasm of nasal cavity                                       |
| C301                                       | Malignant neoplasm of middle ear                                         |
| C310                                       | Malignant neoplasm of maxillary sinus                                    |
| C311                                       | Malignant neoplasm of ethmoidal sinus                                    |
| C312                                       | Malignant neoplasm of frontal sinus                                      |
| C313                                       | Malignant neoplasm of sphenoid sinus                                     |
| C318                                       | Malignant neoplasm of overlapping sites of accessory sinuses             |
| C319                                       | Malignant neoplasm of accessory sinus, unspecified                       |
| C320                                       | Malignant neoplasm of glottis                                            |
| C321                                       | Malignant neoplasm of supraglottis                                       |
| C322                                       | Malignant neoplasm of subglottis                                         |
| C323                                       | Malignant neoplasm of laryngeal cartilage                                |
| C328                                       | Malignant neoplasm of overlapping sites of larynx                        |
| C329                                       | Malignant neoplasm of larynx, unspecified                                |
| C33                                        | Malignant neoplasm of trachea                                            |
| C3400                                      | Malignant neoplasm of unspecified main bronchus                          |
| C3401                                      | Malignant neoplasm of right main bronchus                                |
| C3402                                      | Malignant neoplasm of left main bronchus                                 |
| C3410                                      | Malignant neoplasm of upper lobe, unspecified bronchus or lung           |
| C3411                                      | Malignant neoplasm of upper lobe, right bronchus or lung                 |
| C3412                                      | Malignant neoplasm of upper lobe, left bronchus or lung                  |
| C342                                       | Malignant neoplasm of middle lobe, bronchus or lung                      |
| C3430                                      | Malignant neoplasm of lower lobe, unspecified bronchus or lung           |
| C3431                                      | Malignant neoplasm of lower lobe, right bronchus or lung                 |
| C3432                                      | Malignant neoplasm of lower lobe, left bronchus or lung                  |
| C3480                                      | Malignant neoplasm of overlapping sites of unspecified bronchus and lung |
| C3481                                      | Malignant neoplasm of overlapping sites of right bronchus and lung       |
| C3482                                      | Malignant neoplasm of overlapping sites of left bronchus and lung        |
| C3490                                      | Malignant neoplasm of unspecified part of unspecified bronchus or lung   |
| C3491                                      | Malignant neoplasm of unspecified part of right bronchus or lung         |
| C3492                                      | Malignant neoplasm of unspecified part of left bronchus or lung          |
| C37                                        | Malignant neoplasm of thymus                                             |
| C380                                       | Malignant neoplasm of heart                                              |
| C381                                       | Malignant neoplasm of anterior mediastinum                               |
| C382                                       | Malignant neoplasm of posterior mediastinum                              |
| C383                                       | Malignant neoplasm of mediastinum, part unspecified                      |
| C384                                       | Malignant neoplasm of pleura                                             |
| C388                                       | Malignant neoplasm of overlapping sites of heart, mediastinum and pleura |
| C390                                       | Malignant neoplasm of upper respiratory tract, part unspecified          |
| C399                                       | Malignant neoplasm of lower respiratory tract, part unspecified          |

*Contd...*

**Supplementary Table 12: Contd...**

| <b>ICD-10-CM diagnosis of solid cancer</b> | <b>ICD-10-CM code description</b>                                                           |
|--------------------------------------------|---------------------------------------------------------------------------------------------|
| C4000                                      | Malignant neoplasm of scapula and long bones of unspecified upper limb                      |
| C4001                                      | Malignant neoplasm of scapula and long bones of right upper limb                            |
| C4002                                      | Malignant neoplasm of scapula and long bones of left upper limb                             |
| C4010                                      | Malignant neoplasm of short bones of unspecified upper limb                                 |
| C4011                                      | Malignant neoplasm of short bones of right upper limb                                       |
| C4012                                      | Malignant neoplasm of short bones of left upper limb                                        |
| C4020                                      | Malignant neoplasm of long bones of unspecified lower limb                                  |
| C4021                                      | Malignant neoplasm of long bones of right lower limb                                        |
| C4022                                      | Malignant neoplasm of long bones of left lower limb                                         |
| C4030                                      | Malignant neoplasm of short bones of unspecified lower limb                                 |
| C4031                                      | Malignant neoplasm of short bones of right lower limb                                       |
| C4032                                      | Malignant neoplasm of short bones of left lower limb                                        |
| C4080                                      | Malignant neoplasm of overlapping sites of bone and articular cartilage of unspecified limb |
| C4081                                      | Malignant neoplasm of overlapping sites of bone and articular cartilage of right limb       |
| C4082                                      | Malignant neoplasm of overlapping sites of bone and articular cartilage of left limb        |
| C4090                                      | Malignant neoplasm of unspecified bones and articular cartilage of unspecified limb         |
| C4091                                      | Malignant neoplasm of unspecified bones and articular cartilage of right limb               |
| C4092                                      | Malignant neoplasm of unspecified bones and articular cartilage of left limb                |
| C410                                       | Malignant neoplasm of bones of skull and face                                               |
| C411                                       | Malignant neoplasm of mandible                                                              |
| C412                                       | Malignant neoplasm of vertebral column                                                      |
| C413                                       | Malignant neoplasm of ribs, sternum and clavicle                                            |
| C414                                       | Malignant neoplasm of pelvic bones, sacrum and coccyx                                       |
| C419                                       | Malignant neoplasm of bone and articular cartilage, unspecified                             |
| C430                                       | Malignant melanoma of lip                                                                   |
| C4310                                      | Malignant melanoma of unspecified eyelid, including canthus                                 |
| C4311                                      | Malignant melanoma of right eyelid, including canthus                                       |
| C43111                                     | Malignant melanoma of right upper eyelid, including canthus                                 |
| C43112                                     | Malignant melanoma of right lower eyelid, including canthus                                 |
| C4312                                      | Malignant melanoma of left eyelid, including canthus                                        |
| C43121                                     | Malignant melanoma of left upper eyelid, including canthus                                  |
| C43122                                     | Malignant melanoma of left lower eyelid, including canthus                                  |
| C4320                                      | Malignant melanoma of unspecified ear and external auricular canal                          |
| C4321                                      | Malignant melanoma of right ear and external auricular canal                                |
| C4322                                      | Malignant melanoma of left ear and external auricular canal                                 |
| C4330                                      | Malignant melanoma of unspecified part of face                                              |
| C4331                                      | Malignant melanoma of nose                                                                  |
| C4339                                      | Malignant melanoma of other parts of face                                                   |
| C434                                       | Malignant melanoma of scalp and neck                                                        |
| C4351                                      | Malignant melanoma of anal skin                                                             |
| C4352                                      | Malignant melanoma of skin of breast                                                        |
| C4359                                      | Malignant melanoma of other part of trunk                                                   |
| C4360                                      | Malignant melanoma of unspecified upper limb, including shoulder                            |
| C4361                                      | Malignant melanoma of right upper limb, including shoulder                                  |
| C4362                                      | Malignant melanoma of left upper limb, including shoulder                                   |
| C4370                                      | Malignant melanoma of unspecified lower limb, including hip                                 |
| C4371                                      | Malignant melanoma of right lower limb, including hip                                       |
| C4372                                      | Malignant melanoma of left lower limb, including hip                                        |
| C438                                       | Malignant melanoma of overlapping sites of skin                                             |
| C439                                       | Malignant melanoma of skin, unspecified                                                     |
| C4400                                      | Unspecified malignant neoplasm of skin of lip                                               |
| C4409                                      | Other specified malignant neoplasm of skin of lip                                           |
| C44101                                     | Unspecified malignant neoplasm of skin of unspecified eyelid, including canthus             |
| C44102                                     | Unspecified malignant neoplasm of skin of right eyelid, including canthus                   |
| C441021                                    | Unspecified malignant neoplasm of skin of right upper eyelid, including canthus             |

*Contd...*

**Supplementary Table 12: Contd...**

| <b>ICD-10-CM diagnosis of solid cancer</b> | <b>ICD-10-CM code description</b>                                                          |
|--------------------------------------------|--------------------------------------------------------------------------------------------|
| C441022                                    | Unspecified malignant neoplasm of skin of right lower eyelid, including canthus            |
| C44109                                     | Unspecified malignant neoplasm of skin of left eyelid, including canthus                   |
| C441091                                    | Unspecified malignant neoplasm of skin of left upper eyelid, including canthus             |
| C441092                                    | Unspecified malignant neoplasm of skin of left lower eyelid, including canthus             |
| C44131                                     | Sebaceous cell carcinoma of skin of unspecified eyelid, including canthus                  |
| C441321                                    | Sebaceous cell carcinoma of skin of right upper eyelid, including canthus                  |
| C441322                                    | Sebaceous cell carcinoma of skin of right lower eyelid, including canthus                  |
| C441391                                    | Sebaceous cell carcinoma of skin of left upper eyelid, including canthus                   |
| C441392                                    | Sebaceous cell carcinoma of skin of left lower eyelid, including canthus                   |
| C44191                                     | Other specified malignant neoplasm of skin of unspecified eyelid, including canthus        |
| C44192                                     | Other specified malignant neoplasm of skin of right eyelid, including canthus              |
| C441921                                    | Other specified malignant neoplasm of skin of right upper eyelid, including canthus        |
| C441922                                    | Other specified malignant neoplasm of skin of right lower eyelid, including canthus        |
| C44199                                     | Other specified malignant neoplasm of skin of left eyelid, including canthus               |
| C441991                                    | Other specified malignant neoplasm of skin of left upper eyelid, including canthus         |
| C441992                                    | Other specified malignant neoplasm of skin of left lower eyelid, including canthus         |
| C44201                                     | Unspecified malignant neoplasm of skin of unspecified ear and external auricular canal     |
| C44202                                     | Unspecified malignant neoplasm of skin of right ear and external auricular canal           |
| C44209                                     | Unspecified malignant neoplasm of skin of left ear and external auricular canal            |
| C44291                                     | Other specified malignant neoplasm of skin of unspecified ear and external auricular canal |
| C44292                                     | Other specified malignant neoplasm of skin of right ear and external auricular canal       |
| C44299                                     | Other specified malignant neoplasm of skin of left ear and external auricular canal        |
| C44300                                     | Unspecified malignant neoplasm of skin of unspecified part of face                         |
| C44301                                     | Unspecified malignant neoplasm of skin of nose                                             |
| C44309                                     | Unspecified malignant neoplasm of skin of other parts of face                              |
| C44390                                     | Other specified malignant neoplasm of skin of unspecified parts of face                    |
| C44391                                     | Other specified malignant neoplasm of skin of nose                                         |
| C44399                                     | Other specified malignant neoplasm of skin of other parts of face                          |
| C4440                                      | Unspecified malignant neoplasm of skin of scalp and neck                                   |
| C4449                                      | Other specified malignant neoplasm of skin of scalp and neck                               |
| C44500                                     | Unspecified malignant neoplasm of anal skin                                                |
| C44501                                     | Unspecified malignant neoplasm of skin of breast                                           |
| C44509                                     | Unspecified malignant neoplasm of skin of other part of trunk                              |
| C44590                                     | Other specified malignant neoplasm of anal skin                                            |
| C44591                                     | Other specified malignant neoplasm of skin of breast                                       |
| C44599                                     | Other specified malignant neoplasm of skin of other part of trunk                          |
| C44601                                     | Unspecified malignant neoplasm of skin of unspecified upper limb, including shoulder       |
| C44602                                     | Unspecified malignant neoplasm of skin of right upper limb, including shoulder             |
| C44609                                     | Unspecified malignant neoplasm of skin of left upper limb, including shoulder              |
| C44691                                     | Other specified malignant neoplasm of skin of unspecified upper limb, including shoulder   |
| C44692                                     | Other specified malignant neoplasm of skin of right upper limb, including shoulder         |
| C44699                                     | Other specified malignant neoplasm of skin of left upper limb, including shoulder          |
| C44701                                     | Unspecified malignant neoplasm of skin of unspecified lower limb, including hip            |
| C44702                                     | Unspecified malignant neoplasm of skin of right lower limb, including hip                  |
| C44709                                     | Unspecified malignant neoplasm of skin of left lower limb, including hip                   |
| C44791                                     | Other specified malignant neoplasm of skin of unspecified lower limb, including hip        |
| C44792                                     | Other specified malignant neoplasm of skin of right lower limb, including hip              |
| C44799                                     | Other specified malignant neoplasm of skin of left lower limb, including hip               |
| C4480                                      | Unspecified malignant neoplasm of overlapping sites of skin                                |
| C4489                                      | Other specified malignant neoplasm of overlapping sites of skin                            |
| C4490                                      | Unspecified malignant neoplasm of skin, unspecified                                        |
| C4499                                      | Other specified malignant neoplasm of skin, unspecified                                    |
| C450                                       | Mesothelioma of pleura                                                                     |
| C451                                       | Mesothelioma of peritoneum                                                                 |
| C452                                       | Mesothelioma of pericardium                                                                |

*Contd...*

**Supplementary Table 12: Contd...**

| <b>ICD-10-CM diagnosis of solid cancer</b> | <b>ICD-10-CM code description</b>                                                              |
|--------------------------------------------|------------------------------------------------------------------------------------------------|
| C457                                       | Mesothelioma of other sites                                                                    |
| C459                                       | Mesothelioma, unspecified                                                                      |
| C460                                       | Kaposi's sarcoma of skin                                                                       |
| C461                                       | Kaposi's sarcoma of soft tissue                                                                |
| C462                                       | Kaposi's sarcoma of palate                                                                     |
| C463                                       | Kaposi's sarcoma of lymph nodes                                                                |
| C464                                       | Kaposi's sarcoma of gastrointestinal sites                                                     |
| C4650                                      | Kaposi's sarcoma of unspecified lung                                                           |
| C4651                                      | Kaposi's sarcoma of right lung                                                                 |
| C4652                                      | Kaposi's sarcoma of left lung                                                                  |
| C467                                       | Kaposi's sarcoma of other sites                                                                |
| C469                                       | Kaposi's sarcoma, unspecified                                                                  |
| C470                                       | Malignant neoplasm of peripheral nerves of head, face and neck                                 |
| C4710                                      | Malignant neoplasm of peripheral nerves of unspecified upper limb, including shoulder          |
| C4711                                      | Malignant neoplasm of peripheral nerves of right upper limb, including shoulder                |
| C4712                                      | Malignant neoplasm of peripheral nerves of left upper limb, including shoulder                 |
| C4720                                      | Malignant neoplasm of peripheral nerves of unspecified lower limb, including hip               |
| C4721                                      | Malignant neoplasm of peripheral nerves of right lower limb, including hip                     |
| C4722                                      | Malignant neoplasm of peripheral nerves of left lower limb, including hip                      |
| C473                                       | Malignant neoplasm of peripheral nerves of thorax                                              |
| C474                                       | Malignant neoplasm of peripheral nerves of abdomen                                             |
| C475                                       | Malignant neoplasm of peripheral nerves of pelvis                                              |
| C476                                       | Malignant neoplasm of peripheral nerves of trunk, unspecified                                  |
| C478                                       | Malignant neoplasm of overlapping sites of peripheral nerves and autonomic nervous system      |
| C479                                       | Malignant neoplasm of peripheral nerves and autonomic nervous system, unspecified              |
| C480                                       | Malignant neoplasm of retroperitoneum                                                          |
| C481                                       | Malignant neoplasm of specified parts of peritoneum                                            |
| C482                                       | Malignant neoplasm of peritoneum, unspecified                                                  |
| C488                                       | Malignant neoplasm of overlapping sites of retroperitoneum and peritoneum                      |
| C490                                       | Malignant neoplasm of connective and soft tissue of head, face and neck                        |
| C4910                                      | Malignant neoplasm of connective and soft tissue of unspecified upper limb, including shoulder |
| C4911                                      | Malignant neoplasm of connective and soft tissue of right upper limb, including shoulder       |
| C4912                                      | Malignant neoplasm of connective and soft tissue of left upper limb, including shoulder        |
| C4920                                      | Malignant neoplasm of connective and soft tissue of unspecified lower limb, including hip      |
| C4921                                      | Malignant neoplasm of connective and soft tissue of right lower limb, including hip            |
| C4922                                      | Malignant neoplasm of connective and soft tissue of left lower limb, including hip             |
| C493                                       | Malignant neoplasm of connective and soft tissue of thorax                                     |
| C494                                       | Malignant neoplasm of connective and soft tissue of abdomen                                    |
| C495                                       | Malignant neoplasm of connective and soft tissue of pelvis                                     |
| C496                                       | Malignant neoplasm of connective and soft tissue of trunk, unspecified                         |
| C498                                       | Malignant neoplasm of overlapping sites of connective and soft tissue                          |
| C499                                       | Malignant neoplasm of connective and soft tissue, unspecified                                  |
| C49A0                                      | Gastrointestinal stromal tumor, unspecified site                                               |
| C49A1                                      | Gastrointestinal stromal tumor of esophagus                                                    |
| C49A2                                      | Gastrointestinal stromal tumor of stomach                                                      |
| C49A3                                      | Gastrointestinal stromal tumor of small intestine                                              |
| C49A4                                      | Gastrointestinal stromal tumor of large intestine                                              |
| C49A5                                      | Gastrointestinal stromal tumor of rectum                                                       |
| C49A9                                      | Gastrointestinal stromal tumor of other sites                                                  |
| C4A0                                       | Merkel cell carcinoma of lip                                                                   |
| C4A10                                      | Merkel cell carcinoma of unspecified eyelid, including canthus                                 |
| C4A11                                      | Merkel cell carcinoma of right eyelid, including canthus                                       |
| C4A111                                     | Merkel cell carcinoma of right upper eyelid, including canthus                                 |
| C4A112                                     | Merkel cell carcinoma of right lower eyelid, including canthus                                 |
| C4A12                                      | Merkel cell carcinoma of left eyelid, including canthus                                        |

Contd...

**Supplementary Table 12: Contd...**

| <b>ICD-10-CM diagnosis of solid cancer</b> | <b>ICD-10-CM code description</b>                                       |
|--------------------------------------------|-------------------------------------------------------------------------|
| C4A121                                     | Merkel cell carcinoma of left upper eyelid, including canthus           |
| C4A122                                     | Merkel cell carcinoma of left lower eyelid, including canthus           |
| C4A20                                      | Merkel cell carcinoma of unspecified ear and external auricular canal   |
| C4A21                                      | Merkel cell carcinoma of right ear and external auricular canal         |
| C4A22                                      | Merkel cell carcinoma of left ear and external auricular canal          |
| C4A30                                      | Merkel cell carcinoma of unspecified part of face                       |
| C4A31                                      | Merkel cell carcinoma of nose                                           |
| C4A39                                      | Merkel cell carcinoma of other parts of face                            |
| C4A4                                       | Merkel cell carcinoma of scalp and neck                                 |
| C4A51                                      | Merkel cell carcinoma of anal skin                                      |
| C4A52                                      | Merkel cell carcinoma of skin of breast                                 |
| C4A59                                      | Merkel cell carcinoma of other part of trunk                            |
| C4A60                                      | Merkel cell carcinoma of unspecified upper limb, including shoulder     |
| C4A61                                      | Merkel cell carcinoma of right upper limb, including shoulder           |
| C4A62                                      | Merkel cell carcinoma of left upper limb, including shoulder            |
| C4A70                                      | Merkel cell carcinoma of unspecified lower limb, including hip          |
| C4A71                                      | Merkel cell carcinoma of right lower limb, including hip                |
| C4A72                                      | Merkel cell carcinoma of left lower limb, including hip                 |
| C4A8                                       | Merkel cell carcinoma of overlapping sites                              |
| C4A9                                       | Merkel cell carcinoma, unspecified                                      |
| C50011                                     | Malignant neoplasm of nipple and areola, right female breast            |
| C50012                                     | Malignant neoplasm of nipple and areola, left female breast             |
| C50019                                     | Malignant neoplasm of nipple and areola, unspecified female breast      |
| C50021                                     | Malignant neoplasm of nipple and areola, right male breast              |
| C50022                                     | Malignant neoplasm of nipple and areola, left male breast               |
| C50029                                     | Malignant neoplasm of nipple and areola, unspecified male breast        |
| C50111                                     | Malignant neoplasm of central portion of right female breast            |
| C50112                                     | Malignant neoplasm of central portion of left female breast             |
| C50119                                     | Malignant neoplasm of central portion of unspecified female breast      |
| C50121                                     | Malignant neoplasm of central portion of right male breast              |
| C50122                                     | Malignant neoplasm of central portion of left male breast               |
| C50129                                     | Malignant neoplasm of central portion of unspecified male breast        |
| C50211                                     | Malignant neoplasm of upper-inner quadrant of right female breast       |
| C50212                                     | Malignant neoplasm of upper-inner quadrant of left female breast        |
| C50219                                     | Malignant neoplasm of upper-inner quadrant of unspecified female breast |
| C50221                                     | Malignant neoplasm of upper-inner quadrant of right male breast         |
| C50222                                     | Malignant neoplasm of upper-inner quadrant of left male breast          |
| C50229                                     | Malignant neoplasm of upper-inner quadrant of unspecified male breast   |
| C50311                                     | Malignant neoplasm of lower-inner quadrant of right female breast       |
| C50312                                     | Malignant neoplasm of lower-inner quadrant of left female breast        |
| C50319                                     | Malignant neoplasm of lower-inner quadrant of unspecified female breast |
| C50321                                     | Malignant neoplasm of lower-inner quadrant of right male breast         |
| C50322                                     | Malignant neoplasm of lower-inner quadrant of left male breast          |
| C50329                                     | Malignant neoplasm of lower-inner quadrant of unspecified male breast   |
| C50411                                     | Malignant neoplasm of upper-outer quadrant of right female breast       |
| C50412                                     | Malignant neoplasm of upper-outer quadrant of left female breast        |
| C50419                                     | Malignant neoplasm of upper-outer quadrant of unspecified female breast |
| C50421                                     | Malignant neoplasm of upper-outer quadrant of right male breast         |
| C50422                                     | Malignant neoplasm of upper-outer quadrant of left male breast          |
| C50429                                     | Malignant neoplasm of upper-outer quadrant of unspecified male breast   |
| C50511                                     | Malignant neoplasm of lower-outer quadrant of right female breast       |
| C50512                                     | Malignant neoplasm of lower-outer quadrant of left female breast        |
| C50519                                     | Malignant neoplasm of lower-outer quadrant of unspecified female breast |
| C50521                                     | Malignant neoplasm of lower-outer quadrant of right male breast         |
| C50522                                     | Malignant neoplasm of lower-outer quadrant of left male breast          |

*Contd...*

**Supplementary Table 12: Contd...**

| <b>ICD-10-CM diagnosis of solid cancer</b> | <b>ICD-10-CM code description</b>                                     |
|--------------------------------------------|-----------------------------------------------------------------------|
| C50529                                     | Malignant neoplasm of lower-outer quadrant of unspecified male breast |
| C50611                                     | Malignant neoplasm of axillary tail of right female breast            |
| C50612                                     | Malignant neoplasm of axillary tail of left female breast             |
| C50619                                     | Malignant neoplasm of axillary tail of unspecified female breast      |
| C50621                                     | Malignant neoplasm of axillary tail of right male breast              |
| C50622                                     | Malignant neoplasm of axillary tail of left male breast               |
| C50629                                     | Malignant neoplasm of axillary tail of unspecified male breast        |
| C50811                                     | Malignant neoplasm of overlapping sites of right female breast        |
| C50812                                     | Malignant neoplasm of overlapping sites of left female breast         |
| C50819                                     | Malignant neoplasm of overlapping sites of unspecified female breast  |
| C50821                                     | Malignant neoplasm of overlapping sites of right male breast          |
| C50822                                     | Malignant neoplasm of overlapping sites of left male breast           |
| C50829                                     | Malignant neoplasm of overlapping sites of unspecified male breast    |
| C50911                                     | Malignant neoplasm of unspecified site of right female breast         |
| C50912                                     | Malignant neoplasm of unspecified site of left female breast          |
| C50919                                     | Malignant neoplasm of unspecified site of unspecified female breast   |
| C50921                                     | Malignant neoplasm of unspecified site of right male breast           |
| C50922                                     | Malignant neoplasm of unspecified site of left male breast            |
| C50929                                     | Malignant neoplasm of unspecified site of unspecified male breast     |
| C510                                       | Malignant neoplasm of labium majus                                    |
| C511                                       | Malignant neoplasm of labium minus                                    |
| C512                                       | Malignant neoplasm of clitoris                                        |
| C518                                       | Malignant neoplasm of overlapping sites of vulva                      |
| C519                                       | Malignant neoplasm of vulva, unspecified                              |
| C52                                        | Malignant neoplasm of vagina                                          |
| C530                                       | Malignant neoplasm of endocervix                                      |
| C531                                       | Malignant neoplasm of exocervix                                       |
| C538                                       | Malignant neoplasm of overlapping sites of cervix uteri               |
| C539                                       | Malignant neoplasm of cervix uteri, unspecified                       |
| C540                                       | Malignant neoplasm of isthmus uteri                                   |
| C541                                       | Malignant neoplasm of endometrium                                     |
| C542                                       | Malignant neoplasm of myometrium                                      |
| C543                                       | Malignant neoplasm of fundus uteri                                    |
| C548                                       | Malignant neoplasm of overlapping sites of corpus uteri               |
| C549                                       | Malignant neoplasm of corpus uteri, unspecified                       |
| C55                                        | Malignant neoplasm of uterus, part unspecified                        |
| C561                                       | Malignant neoplasm of right ovary                                     |
| C562                                       | Malignant neoplasm of left ovary                                      |
| C563                                       | Malignant neoplasm of bilateral ovaries                               |
| C569                                       | Malignant neoplasm of unspecified ovary                               |
| C5700                                      | Malignant neoplasm of unspecified fallopian tube                      |
| C5701                                      | Malignant neoplasm of right fallopian tube                            |
| C5702                                      | Malignant neoplasm of left fallopian tube                             |
| C5710                                      | Malignant neoplasm of unspecified broad ligament                      |
| C5711                                      | Malignant neoplasm of right broad ligament                            |
| C5712                                      | Malignant neoplasm of left broad ligament                             |
| C5720                                      | Malignant neoplasm of unspecified round ligament                      |
| C5721                                      | Malignant neoplasm of right round ligament                            |
| C5722                                      | Malignant neoplasm of left round ligament                             |
| C573                                       | Malignant neoplasm of parametrium                                     |
| C574                                       | Malignant neoplasm of uterine adnexa, unspecified                     |
| C577                                       | Malignant neoplasm of other specified female genital organs           |
| C578                                       | Malignant neoplasm of overlapping sites of female genital organs      |
| C579                                       | Malignant neoplasm of female genital organ, unspecified               |
| C58                                        | Malignant neoplasm of placenta                                        |

*Contd...*



**Supplementary Table 12: Contd...**

| <b>ICD-10-CM diagnosis of solid cancer</b> | <b>ICD-10-CM code description</b>                                                      |
|--------------------------------------------|----------------------------------------------------------------------------------------|
| C600                                       | Malignant neoplasm of prepuce                                                          |
| C601                                       | Malignant neoplasm of glans penis                                                      |
| C602                                       | Malignant neoplasm of body of penis                                                    |
| C608                                       | Malignant neoplasm of overlapping sites of penis                                       |
| C609                                       | Malignant neoplasm of penis, unspecified                                               |
| C61                                        | Malignant neoplasm of prostate                                                         |
| C6200                                      | Malignant neoplasm of unspecified undescended testis                                   |
| C6201                                      | Malignant neoplasm of undescended right testis                                         |
| C6202                                      | Malignant neoplasm of undescended left testis                                          |
| C6210                                      | Malignant neoplasm of unspecified descended testis                                     |
| C6211                                      | Malignant neoplasm of descended right testis                                           |
| C6212                                      | Malignant neoplasm of descended left testis                                            |
| C6290                                      | Malignant neoplasm of unspecified testis, unspecified whether descended or undescended |
| C6291                                      | Malignant neoplasm of right testis, unspecified whether descended or undescended       |
| C6292                                      | Malignant neoplasm of left testis, unspecified whether descended or undescended        |
| C6300                                      | Malignant neoplasm of unspecified epididymis                                           |
| C6301                                      | Malignant neoplasm of right epididymis                                                 |
| C6302                                      | Malignant neoplasm of left epididymis                                                  |
| C6310                                      | Malignant neoplasm of unspecified spermatic cord                                       |
| C6311                                      | Malignant neoplasm of right spermatic cord                                             |
| C6312                                      | Malignant neoplasm of left spermatic cord                                              |
| C632                                       | Malignant neoplasm of scrotum                                                          |
| C637                                       | Malignant neoplasm of other specified male genital organs                              |
| C638                                       | Malignant neoplasm of overlapping sites of male genital organs                         |
| C639                                       | Malignant neoplasm of male genital organ, unspecified                                  |
| C641                                       | Malignant neoplasm of right kidney, except renal pelvis                                |
| C642                                       | Malignant neoplasm of left kidney, except renal pelvis                                 |
| C649                                       | Malignant neoplasm of unspecified kidney, except renal pelvis                          |
| C651                                       | Malignant neoplasm of right renal pelvis                                               |
| C652                                       | Malignant neoplasm of left renal pelvis                                                |
| C659                                       | Malignant neoplasm of unspecified renal pelvis                                         |
| C661                                       | Malignant neoplasm of right ureter                                                     |
| C662                                       | Malignant neoplasm of left ureter                                                      |
| C669                                       | Malignant neoplasm of unspecified ureter                                               |
| C670                                       | Malignant neoplasm of trigone of bladder                                               |
| C671                                       | Malignant neoplasm of dome of bladder                                                  |
| C672                                       | Malignant neoplasm of lateral wall of bladder                                          |
| C673                                       | Malignant neoplasm of anterior wall of bladder                                         |
| C674                                       | Malignant neoplasm of posterior wall of bladder                                        |
| C675                                       | Malignant neoplasm of bladder neck                                                     |
| C676                                       | Malignant neoplasm of ureteric orifice                                                 |
| C677                                       | Malignant neoplasm of urachus                                                          |
| C678                                       | Malignant neoplasm of overlapping sites of bladder                                     |
| C679                                       | Malignant neoplasm of bladder, unspecified                                             |
| C680                                       | Malignant neoplasm of urethra                                                          |
| C681                                       | Malignant neoplasm of paraurethral glands                                              |
| C688                                       | Malignant neoplasm of overlapping sites of urinary organs                              |
| C689                                       | Malignant neoplasm of urinary organ, unspecified                                       |
| C6900                                      | Malignant neoplasm of unspecified conjunctiva                                          |
| C6901                                      | Malignant neoplasm of right conjunctiva                                                |
| C6902                                      | Malignant neoplasm of left conjunctiva                                                 |
| C6910                                      | Malignant neoplasm of unspecified cornea                                               |
| C6911                                      | Malignant neoplasm of right cornea                                                     |
| C6912                                      | Malignant neoplasm of left cornea                                                      |
| C6920                                      | Malignant neoplasm of unspecified retina                                               |

*Contd...*

**Supplementary Table 12: Contd...**

| <b>ICD-10-CM diagnosis of solid cancer</b> | <b>ICD-10-CM code description</b>                                     |
|--------------------------------------------|-----------------------------------------------------------------------|
| C6921                                      | Malignant neoplasm of right retina                                    |
| C6922                                      | Malignant neoplasm of left retina                                     |
| C6930                                      | Malignant neoplasm of unspecified choroid                             |
| C6931                                      | Malignant neoplasm of right choroid                                   |
| C6932                                      | Malignant neoplasm of left choroid                                    |
| C6940                                      | Malignant neoplasm of unspecified ciliary body                        |
| C6941                                      | Malignant neoplasm of right ciliary body                              |
| C6942                                      | Malignant neoplasm of left ciliary body                               |
| C6950                                      | Malignant neoplasm of unspecified lacrimal gland and duct             |
| C6951                                      | Malignant neoplasm of right lacrimal gland and duct                   |
| C6952                                      | Malignant neoplasm of left lacrimal gland and duct                    |
| C6960                                      | Malignant neoplasm of unspecified orbit                               |
| C6961                                      | Malignant neoplasm of right orbit                                     |
| C6962                                      | Malignant neoplasm of left orbit                                      |
| C6980                                      | Malignant neoplasm of overlapping sites of unspecified eye and adnexa |
| C6981                                      | Malignant neoplasm of overlapping sites of right eye and adnexa       |
| C6982                                      | Malignant neoplasm of overlapping sites of left eye and adnexa        |
| C6990                                      | Malignant neoplasm of unspecified site of unspecified eye             |
| C6991                                      | Malignant neoplasm of unspecified site of right eye                   |
| C6992                                      | Malignant neoplasm of unspecified site of left eye                    |
| C700                                       | Malignant neoplasm of cerebral meninges                               |
| C701                                       | Malignant neoplasm of spinal meninges                                 |
| C709                                       | Malignant neoplasm of meninges, unspecified                           |
| C710                                       | Malignant neoplasm of cerebrum, except lobes and ventricles           |
| C711                                       | Malignant neoplasm of frontal lobe                                    |
| C712                                       | Malignant neoplasm of temporal lobe                                   |
| C713                                       | Malignant neoplasm of parietal lobe                                   |
| C714                                       | Malignant neoplasm of occipital lobe                                  |
| C715                                       | Malignant neoplasm of cerebral ventricle                              |
| C716                                       | Malignant neoplasm of cerebellum                                      |
| C717                                       | Malignant neoplasm of brain stem                                      |
| C718                                       | Malignant neoplasm of overlapping sites of brain                      |
| C719                                       | Malignant neoplasm of brain, unspecified                              |
| C720                                       | Malignant neoplasm of spinal cord                                     |
| C721                                       | Malignant neoplasm of cauda equina                                    |
| C7220                                      | Malignant neoplasm of unspecified olfactory nerve                     |
| C7221                                      | Malignant neoplasm of right olfactory nerve                           |
| C7222                                      | Malignant neoplasm of left olfactory nerve                            |
| C7230                                      | Malignant neoplasm of unspecified optic nerve                         |
| C7231                                      | Malignant neoplasm of right optic nerve                               |
| C7232                                      | Malignant neoplasm of left optic nerve                                |
| C7240                                      | Malignant neoplasm of unspecified acoustic nerve                      |
| C7241                                      | Malignant neoplasm of right acoustic nerve                            |
| C7242                                      | Malignant neoplasm of left acoustic nerve                             |
| C7250                                      | Malignant neoplasm of unspecified cranial nerve                       |
| C7259                                      | Malignant neoplasm of other cranial nerves                            |
| C729                                       | Malignant neoplasm of central nervous system, unspecified             |
| C73                                        | Malignant neoplasm of thyroid gland                                   |
| C7400                                      | Malignant neoplasm of cortex of unspecified adrenal gland             |
| C7401                                      | Malignant neoplasm of cortex of right adrenal gland                   |
| C7402                                      | Malignant neoplasm of cortex of left adrenal gland                    |
| C7410                                      | Malignant neoplasm of medulla of unspecified adrenal gland            |
| C7411                                      | Malignant neoplasm of medulla of right adrenal gland                  |
| C7412                                      | Malignant neoplasm of medulla of left adrenal gland                   |
| C7490                                      | Malignant neoplasm of unspecified part of unspecified adrenal gland   |

*Contd...*

**Supplementary Table 12: Contd...**

| <b>ICD-10-CM diagnosis of solid cancer</b> | <b>ICD-10-CM code description</b>                                     |
|--------------------------------------------|-----------------------------------------------------------------------|
| C7491                                      | Malignant neoplasm of unspecified part of right adrenal gland         |
| C7492                                      | Malignant neoplasm of unspecified part of left adrenal gland          |
| C750                                       | Malignant neoplasm of parathyroid gland                               |
| C751                                       | Malignant neoplasm of pituitary gland                                 |
| C752                                       | Malignant neoplasm of craniopharyngeal duct                           |
| C753                                       | Malignant neoplasm of pineal gland                                    |
| C754                                       | Malignant neoplasm of carotid body                                    |
| C755                                       | Malignant neoplasm of aortic body and other paraganglia               |
| C758                                       | Malignant neoplasm with pluriglandular involvement, unspecified       |
| C759                                       | Malignant neoplasm of endocrine gland, unspecified                    |
| C760                                       | Malignant neoplasm of head, face and neck                             |
| C761                                       | Malignant neoplasm of thorax                                          |
| C762                                       | Malignant neoplasm of abdomen                                         |
| C763                                       | Malignant neoplasm of pelvis                                          |
| C7640                                      | Malignant neoplasm of unspecified upper limb                          |
| C7641                                      | Malignant neoplasm of right upper limb                                |
| C7642                                      | Malignant neoplasm of left upper limb                                 |
| C7650                                      | Malignant neoplasm of unspecified lower limb                          |
| C7651                                      | Malignant neoplasm of right lower limb                                |
| C7652                                      | Malignant neoplasm of left lower limb                                 |
| C768                                       | Malignant neoplasm of other specified ill-defined sites               |
| C7A00                                      | Malignant carcinoid tumor of unspecified site                         |
| C7A010                                     | Malignant carcinoid tumor of the duodenum                             |
| C7A011                                     | Malignant carcinoid tumor of the jejunum                              |
| C7A012                                     | Malignant carcinoid tumor of the ileum                                |
| C7A019                                     | Malignant carcinoid tumor of the small intestine, unspecified portion |
| C7A020                                     | Malignant carcinoid tumor of the appendix                             |
| C7A021                                     | Malignant carcinoid tumor of the cecum                                |
| C7A022                                     | Malignant carcinoid tumor of the ascending colon                      |
| C7A023                                     | Malignant carcinoid tumor of the transverse colon                     |
| C7A024                                     | Malignant carcinoid tumor of the descending colon                     |
| C7A025                                     | Malignant carcinoid tumor of the sigmoid colon                        |
| C7A026                                     | Malignant carcinoid tumor of the rectum                               |
| C7A029                                     | Malignant carcinoid tumor of the large intestine, unspecified portion |
| C7A090                                     | Malignant carcinoid tumor of the bronchus and lung                    |
| C7A091                                     | Malignant carcinoid tumor of the thymus                               |
| C7A092                                     | Malignant carcinoid tumor of the stomach                              |
| C7A093                                     | Malignant carcinoid tumor of the kidney                               |
| C7A094                                     | Malignant carcinoid tumor of the foregut, unspecified                 |
| C7A095                                     | Malignant carcinoid tumor of the midgut, unspecified                  |
| C7A096                                     | Malignant carcinoid tumor of the hindgut, unspecified                 |
| C7A098                                     | Malignant carcinoid tumors of other sites                             |
| C7A1                                       | Malignant poorly differentiated neuroendocrine tumors                 |
| C7A8                                       | Other malignant neuroendocrine tumors                                 |
| D469                                       | Myelodysplastic syndrome, unspecified                                 |
| E3121                                      | MEN type I                                                            |
| E3122                                      | MEN type IIA                                                          |
| E3123                                      | MEN type IIB                                                          |

MEN=Multiple endocrine neoplasia, ICD-10-CM=International Classification of Diseases, 10<sup>th</sup> Edition Clinical Modification
